# Supplementary material for: Tandem-like vanadium cluster chains in a polyoxovanadate-based metal–organic framework for efficient catalytic oxidation of sulfides
Source: Royal Society of Chemistry journal article supplement (doi:10.1039/d1qi00799h), 2021-01-01
Supplement: d1qi00799h1.pdf [file d1qi00799h1.pdf]

## Supporting Information

### **Tandem-like vanadium clusters chains in a polyoxovanadate-based metal–organic framework for efficiently catalytic oxidation of sulfides**

Tian-Yi Dang,<sup>†</sup> Run-Han Li,<sup>†</sup> Hong-Rui Tian,<sup>a</sup> Qian Wang,<sup>a</sup> Ying Lu<sup>\*a</sup> and Shu-Xia  
Liu<sup>\*a</sup>

*<sup>a</sup>Key Laboratory of Polyoxometalate and Reticular Material Chemistry of the Ministry  
of Education, College of Chemistry, Northeast Normal University, Changchun, Jilin  
130024, P. R. China.*

*E-mail: [luy968@nenu.edu.cn](mailto:luy968@nenu.edu.cn); [liusx@nenu.edu.cn](mailto:liusx@nenu.edu.cn)*

## Table of Contents

|    |                                                                          |     |
|----|--------------------------------------------------------------------------|-----|
| 1  | Crystallographic Data and Structure Refinements .....                    | S3  |
| 2  | The asymmetric unit of V-Ni-MOF .....                                    | S5  |
| 3  | PXRD patterns of V-Ni-MOF .....                                          | S5  |
| 4  | FTIR Spectrum of V-Ni-MOF .....                                          | S6  |
| 5  | XPS Spectra of V and Ni in V-Ni-MOF .....                                | S6  |
| 6  | TGA curve of V-Ni-MOF .....                                              | S7  |
| 7  | PXRD patterns of V-Ni-MOF after immersing in various solvents .....      | S7  |
| 8  | <sup>1</sup> H-NMR Spectra of the sulfides .....                         | S8  |
| 9  | <sup>1</sup> H-NMR Spectra of the sulfones .....                         | S11 |
| 10 | Recycling tests of the V-Ni-MOF .....                                    | S14 |
| 11 | SEM images of V-Ni-MOF .....                                             | S14 |
| 12 | Compared with the crystalline materials containing polyoxovanadate. .... | S15 |
| 13 | References.....                                                          | S15 |

## 1. Crystallographic Data and Structure Refinements

**Table S1.** Crystallographic data and structure refinement of V-Ni-MOF

| Name                                             | V-Ni-MOF                                                                        |
|--------------------------------------------------|---------------------------------------------------------------------------------|
| Empirical formula                                | C <sub>28</sub> H <sub>28</sub> N <sub>8</sub> NiO <sub>11</sub> V <sub>4</sub> |
| Formula weight                                   | 915.05                                                                          |
| Temperature (K)                                  | 295.05                                                                          |
| Wave length (Å)                                  | 0.71073                                                                         |
| Crystal system                                   | monoclinic                                                                      |
| Space group                                      | C2/c                                                                            |
| a (Å)                                            | 24.916(2)                                                                       |
| b (Å)                                            | 11.1241(10)                                                                     |
| c (Å)                                            | 16.1128(13)                                                                     |
| α (deg)                                          | 90                                                                              |
| β (deg)                                          | 126.088(2)                                                                      |
| γ (deg)                                          | 90                                                                              |
| Volume (Å <sup>3</sup> )                         | 3609.1(6)                                                                       |
| Z, Dcalc (Mg/m <sup>3</sup> )                    | 4, 1.684                                                                        |
| Absorption coefficient (mm <sup>-1</sup> )       | 1.576                                                                           |
| F (000)                                          | 1840.0                                                                          |
| Crystal size (mm <sup>3</sup> )                  | 0.21 × 0.2 × 0.19                                                               |
| θ range (deg)                                    | 2.227 to 25.074                                                                 |
| index range (deg)                                | -29 ≤ h ≤ 29, -13 ≤ k ≤ 13, -19 ≤ l ≤ 18                                        |
| Reflections collected / unique                   | 27823 / 3212 [R <sub>int</sub> = 0.0777]                                        |
| Data / restraints / parameters                   | 3212 / 133 / 317                                                                |
| Goodness-of-fit on F <sup>2</sup>                | 1.043                                                                           |
| R1, wR <sub>2</sub> (I > 2σ(I))                  | 0.0416, 0.0970                                                                  |
| R1, wR <sub>2</sub> (all data)                   | 0.0721, 0.1142                                                                  |
| Largest diff. peak and hole (e Å <sup>-3</sup> ) | 0.40, -0.54                                                                     |

$$R_1 = \frac{\sum ||F_o| - |F_c||}{\sum |F_o|} \cdot wR_2 = \left[ \frac{\sum [w(F_o^2 - F_c^2)^2]}{\sum [w(F_o^2)^2]} \right]^{1/2}$$

**Table S2.** Selected bond lengths [Å] and angles [deg] for **V-Ni-MOF**

| <b>V-Ni-MOF</b>                               |           |                                            |           |
|-----------------------------------------------|-----------|--------------------------------------------|-----------|
| Ni(1)-O(1) <sup>1</sup>                       | 2.097(3)  | Ni(1)-O(1)                                 | 2.097(3)  |
| Ni(1)-N(3)                                    | 2.072(3)  | Ni(1)-N(3) <sup>1</sup>                    | 2.072(3)  |
| Ni(1)-N(1)                                    | 2.090(3)  | Ni(1)-N(1) <sup>1</sup>                    | 2.090(3)  |
| V(1)-O(1)                                     | 1.602(3)  | V(1)-O(2)                                  | 1.587(4)  |
| V(1)-O(0AA)                                   | 1.783(11) | V(1)-O(4AA)                                | 1.803(15) |
| V(2)-O(0AA) <sup>3</sup>                      | 1.747(12) | V(2)-O(6A)                                 | 1.569(10) |
| V(2)-O(2AA) <sup>2</sup>                      | 1.779(14) | V(2)-O(4AA)                                | 1.798(14) |
| O(1) <sup>1</sup> -Ni(1)-O(1)                 | 180.0     | N(3) <sup>1</sup> -Ni(1)-N(1) <sup>1</sup> | 85.88(11) |
| N(3) <sup>1</sup> -Ni(1)-N(1)                 | 94.13(11) | N(3)-Ni(1)-O(1)                            | 90.47(11) |
| N(3)-Ni(1)-O(1) <sup>1</sup>                  | 89.53(11) | N(3) <sup>1</sup> -Ni(1)-N(3)              | 180       |
| N(1) <sup>1</sup> -Ni(1)-N(1)                 | 180       | O(1)-Ni(1)-N(1)                            | 89.52(12) |
| O(1)-Ni(1)-N(1) <sup>1</sup>                  | 90.48(12) | O(0AA)-V(1)-O(1)                           | 120.4(4)  |
| O(0AA)-V(1)-O(2)                              | 93.3(4)   | O(4AA)-V(1)-O(2)                           | 99.2(4)   |
| O(4AA)-V(1)-O(1)                              | 114.1(5)  | O(2)-V(1)-O(1)                             | 109.3(2)  |
| O(6A)-V(2)-O(2AA) <sup>2</sup>                | 110.7(5)  | O(6A)-V(2)-O(0AA) <sup>3</sup>             | 112.6(6)  |
| O(0AA) <sup>3</sup> -V(2)-O(2AA) <sup>2</sup> | 103.8(5)  |                                            |           |

<sup>1</sup> 1-X,1-Y,1-Z; <sup>2</sup> 1-X,+Y,1/2-Z; <sup>3</sup> 1-X,2-Y,1-Z.

## 2. The asymmetric unit of V-Ni-MOF

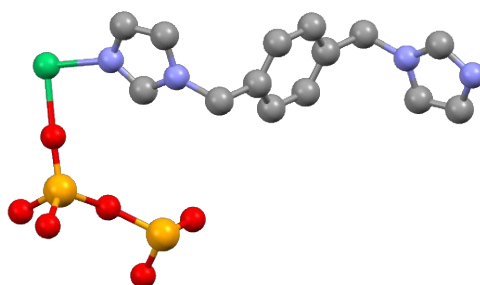

**Figure S1.** The asymmetric unit of V-Ni-MOF.

## 3. PXRD patterns of V-Ni-MOF

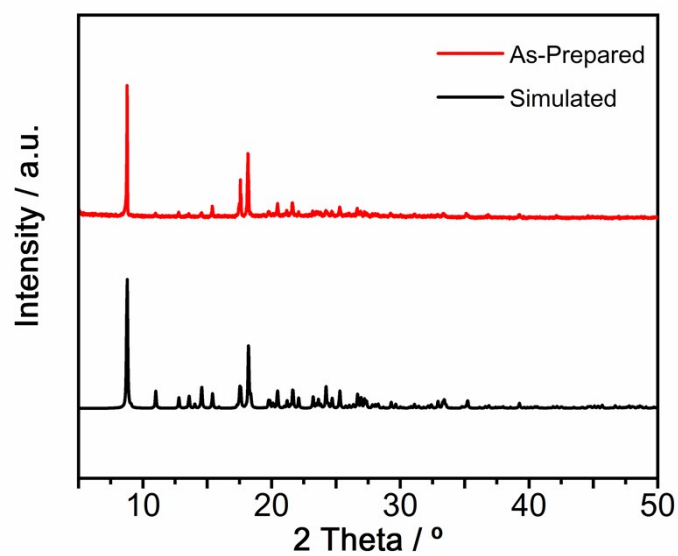

**Figure S2.** The PXRD patterns of V-Ni-MOF.

#### 4. FTIR Spectrum of V-Ni-MOF

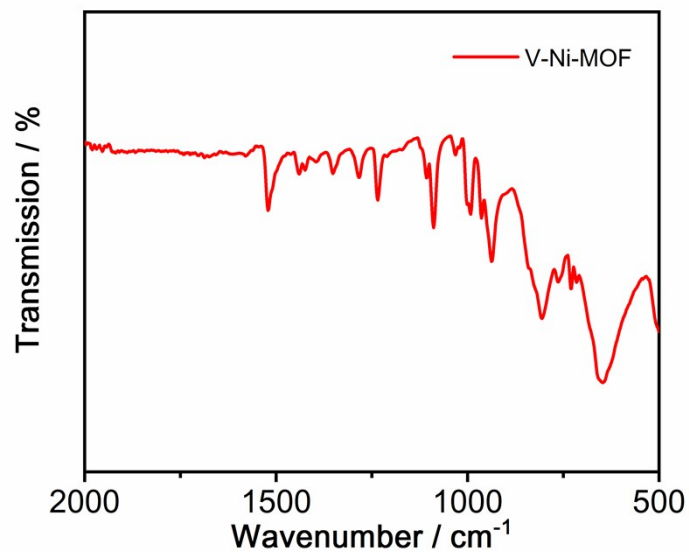

Figure S3. The FTIR spectrum of V-Ni-MOF.

#### 5. XPS Spectra of V and Ni in V-Ni-MOF

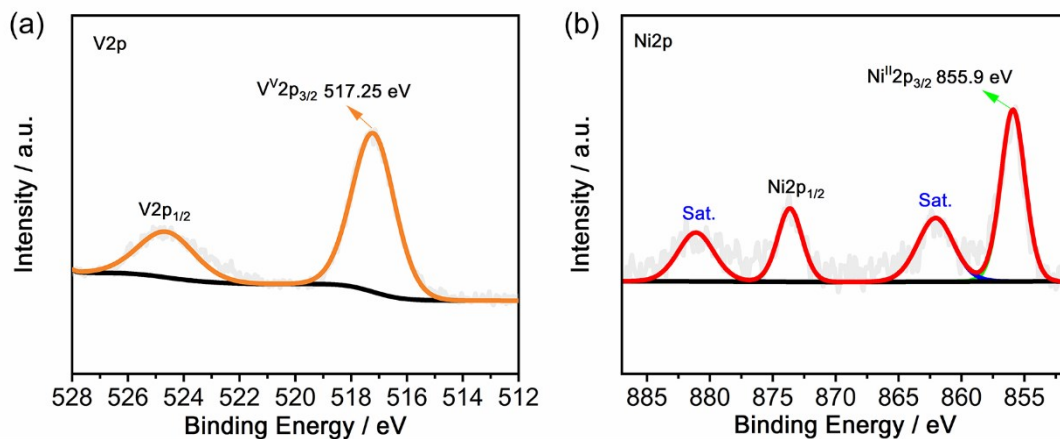

Figure S4. XPS spectra of V (a) and Ni (b) in V-Ni-MOF.

## 6. TGA curve of V-Ni-MOF

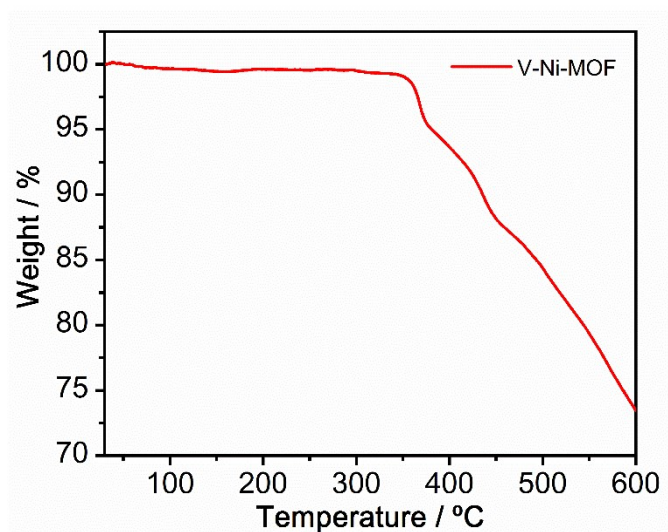

**Figure S5.** The TGA curve of V-Ni-MOF.

## 7. PXRD patterns of V-Ni-MOF after immersing in various solvents

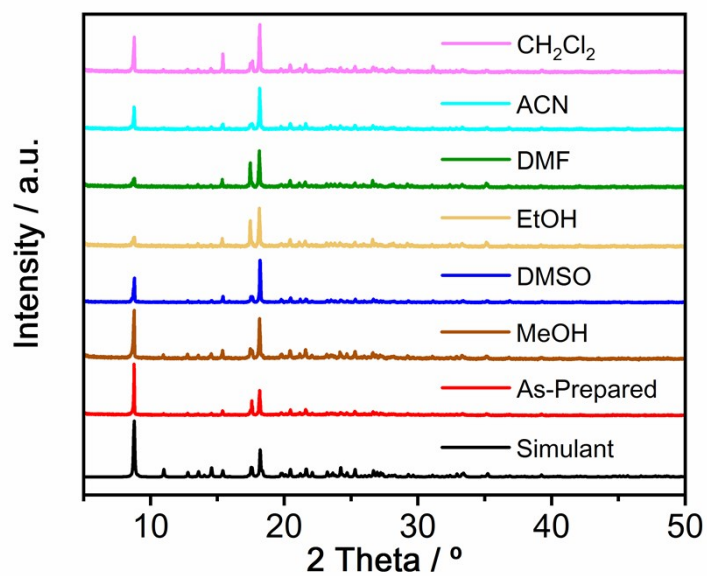

**Figure S6.** The PXRD patterns of V-Ni-MOF after immersing in various solvents for 7 days.

## 8. $^1\text{H-NMR}$ Spectra of the sulfides

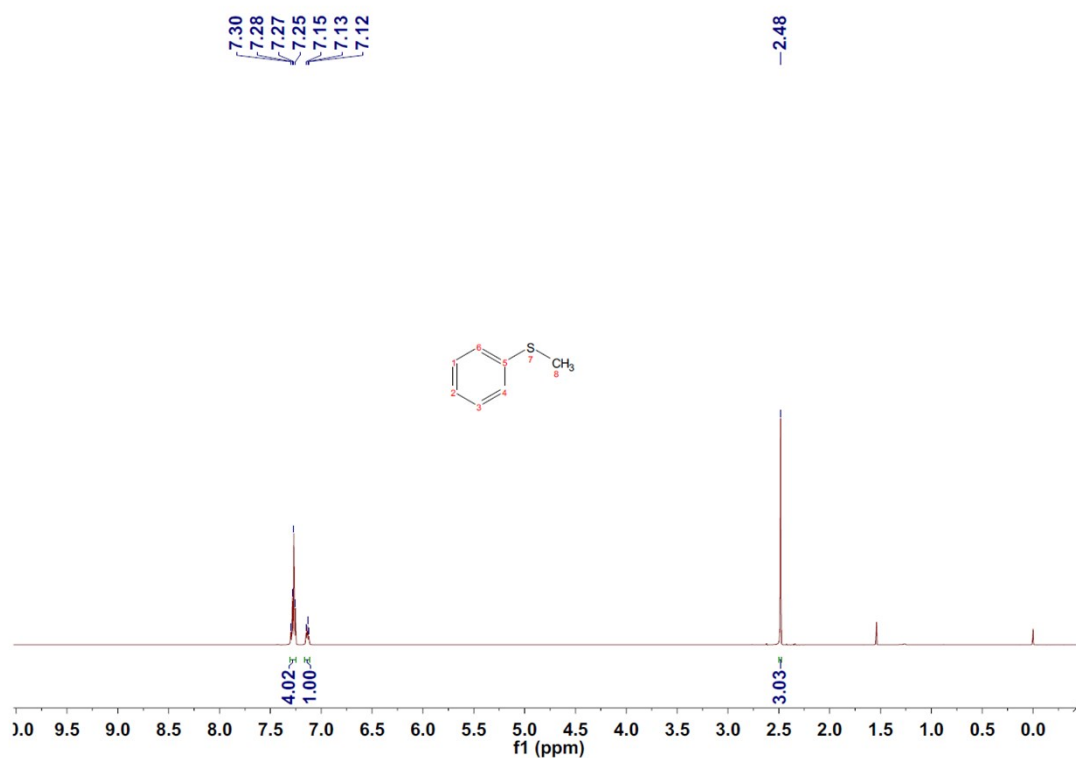

$^1\text{H-NMR}$  Spectra of methyl phenyl sulfide.

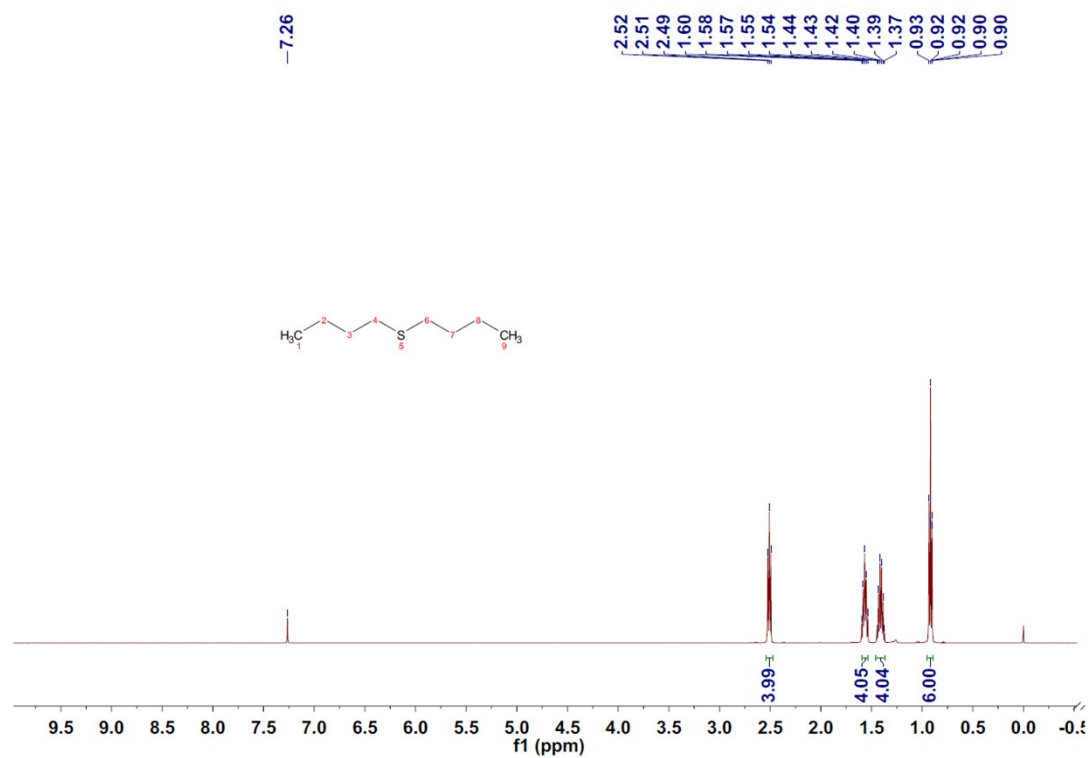

$^1\text{H-NMR}$  Spectra of dibutyl sulfide.



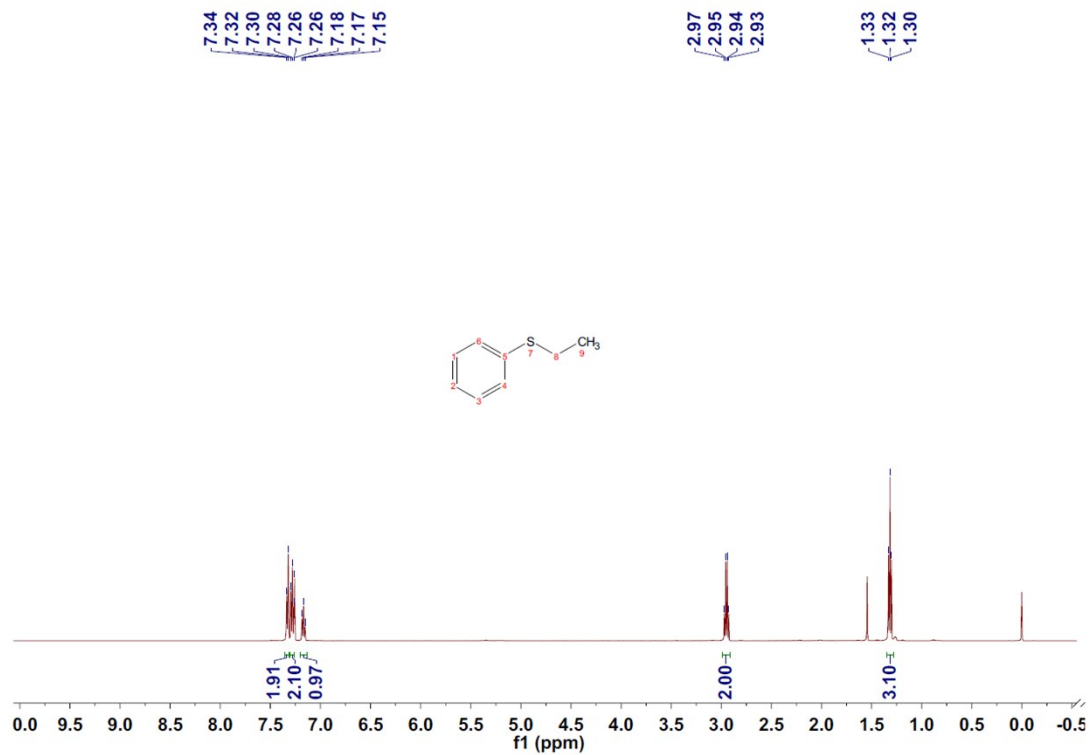

<sup>1</sup>H-NMR Spectra of ethyl phenyl sulfide.

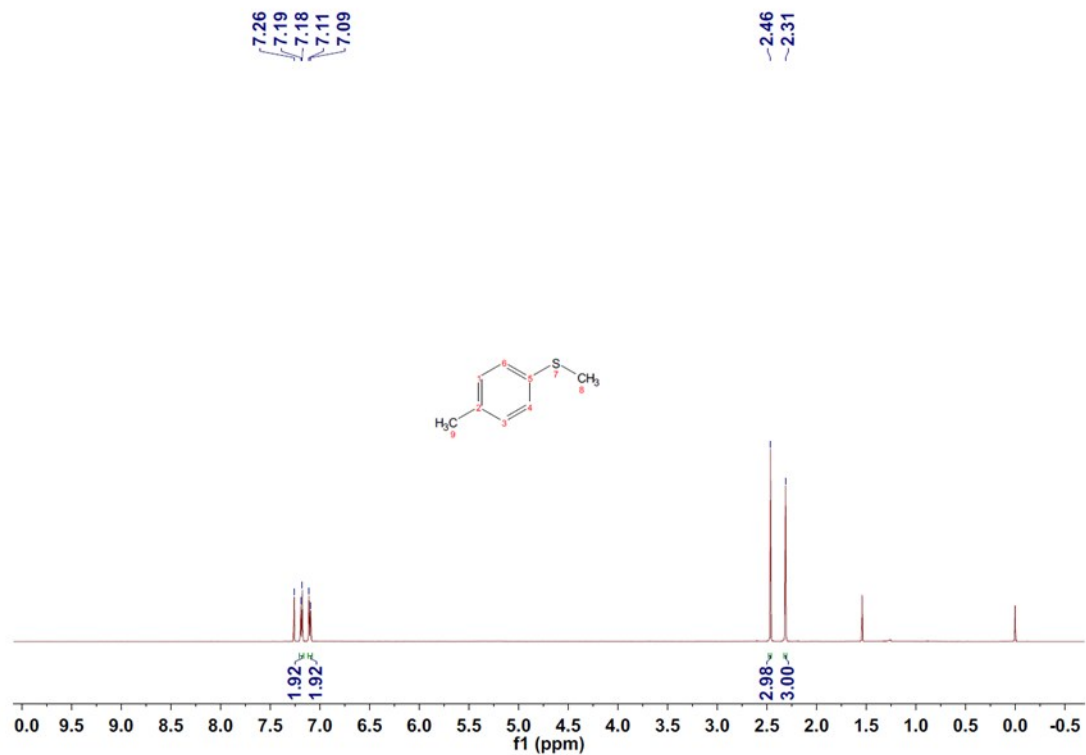

<sup>1</sup>H-NMR Spectra of methyl p-tolyl sulfide.

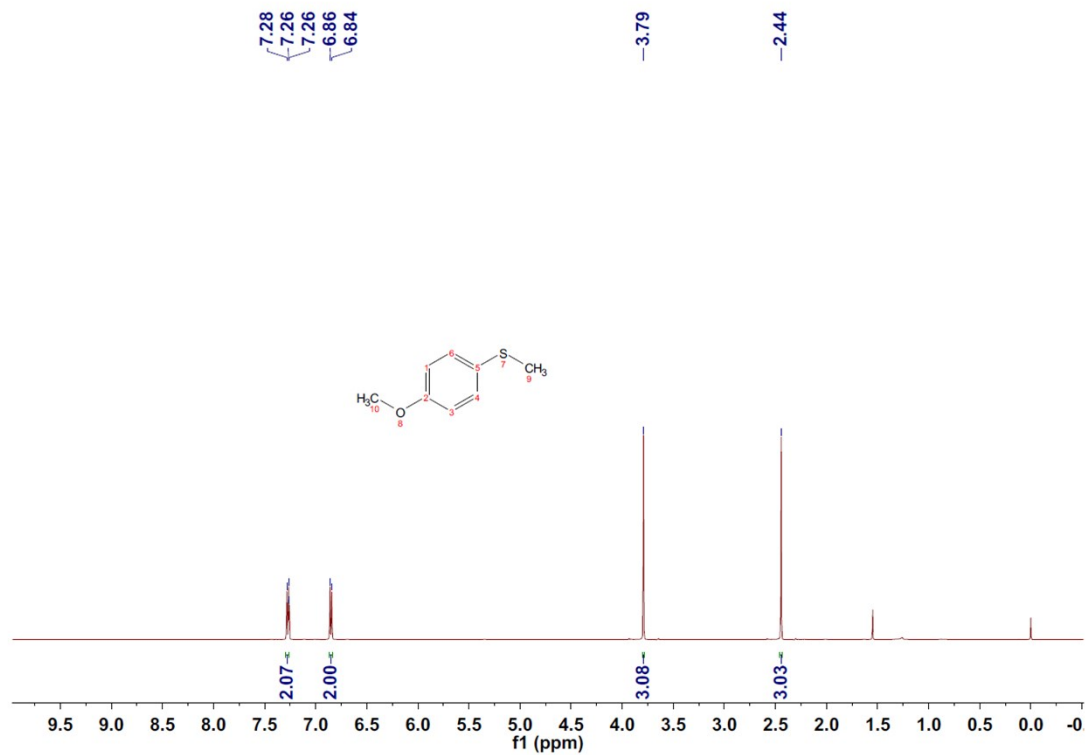

<sup>1</sup>H-NMR Spectra of 4-methoxythioanisole.

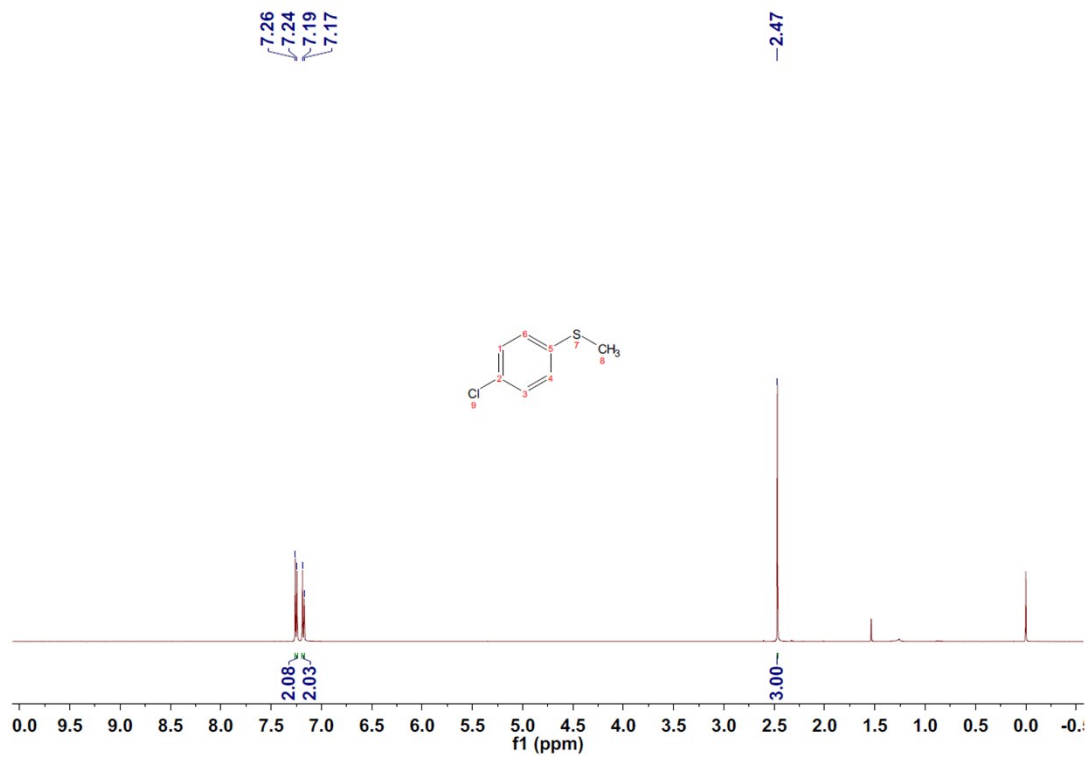

<sup>1</sup>H-NMR Spectra of 4-chlorothioanisole.

## 9. $^1\text{H-NMR}$ Spectra of the sulfones

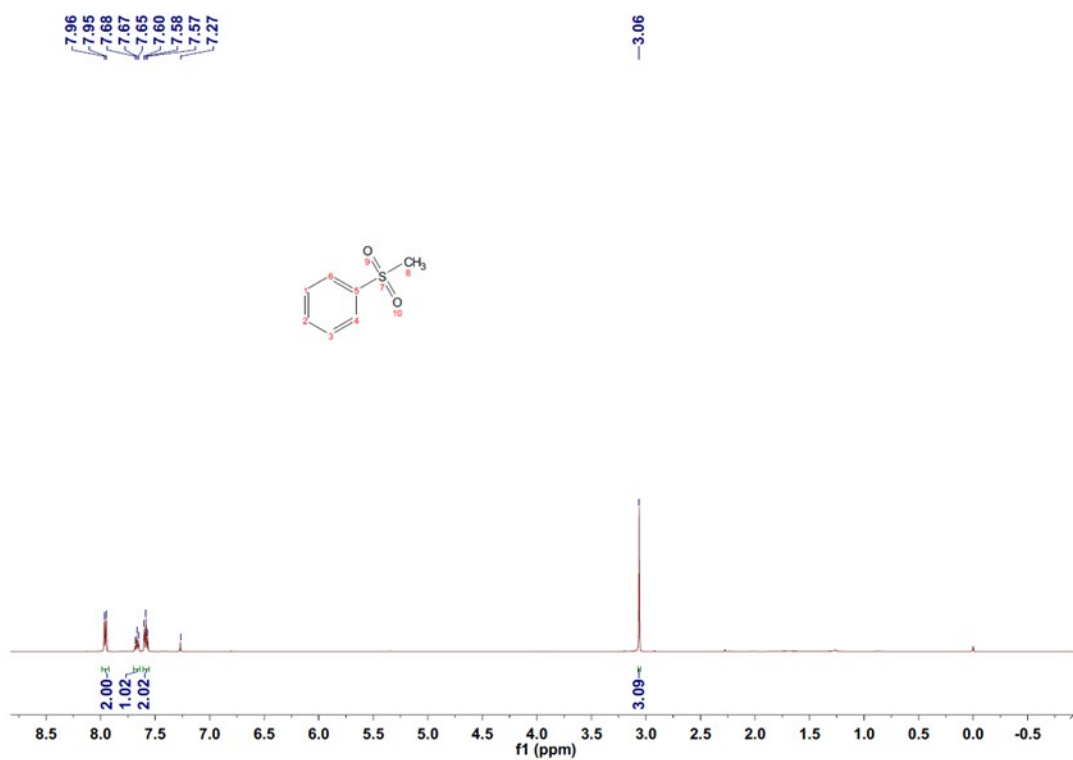

$^1\text{H-NMR}$  Spectra of methyl phenyl sulfone.

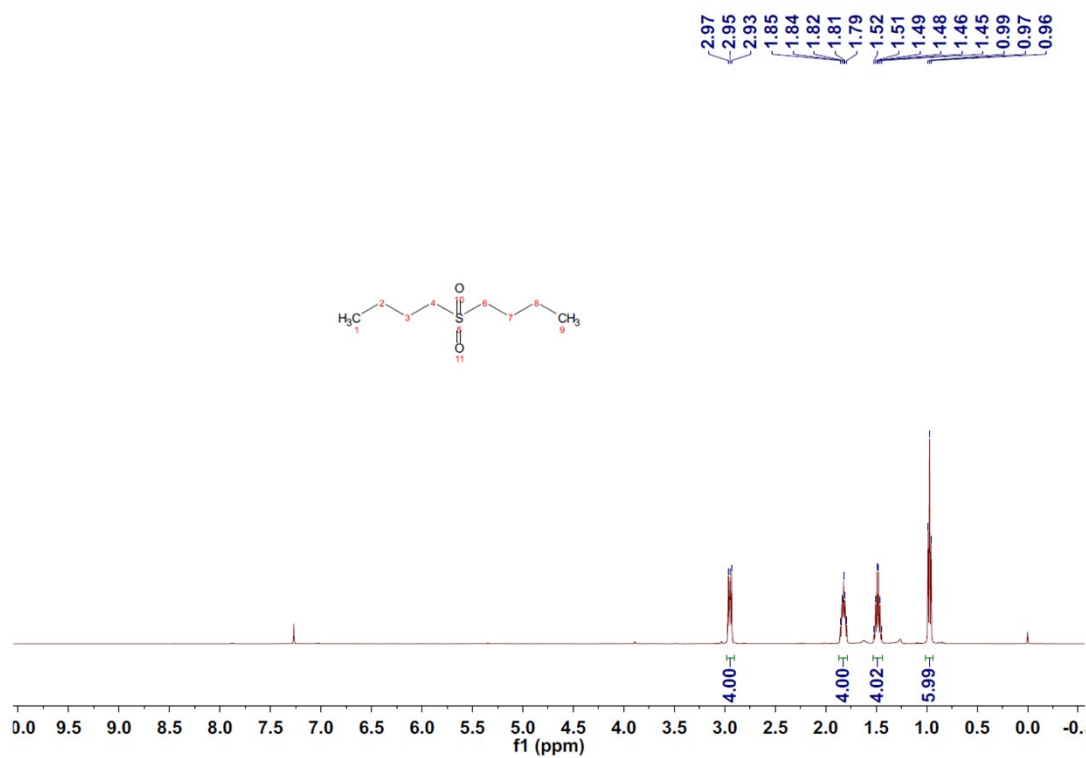

$^1\text{H-NMR}$  Spectra of dibutyl sulfone.

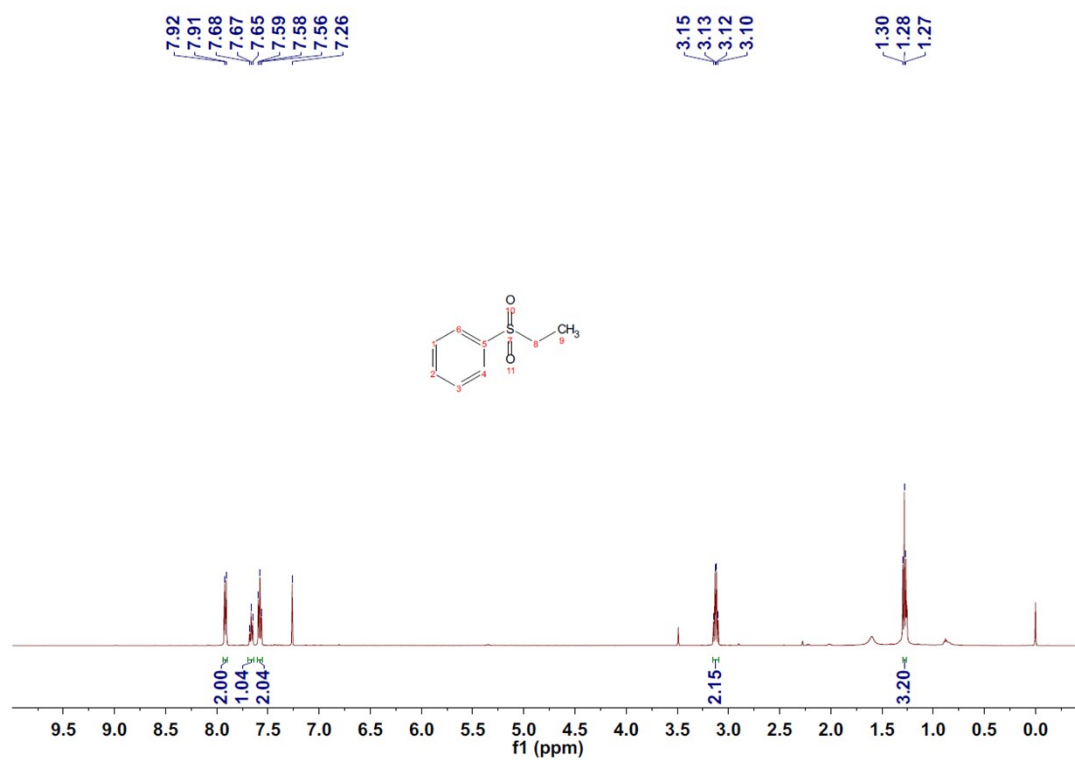

<sup>1</sup>H-NMR Spectra of ethyl phenyl sulfone.

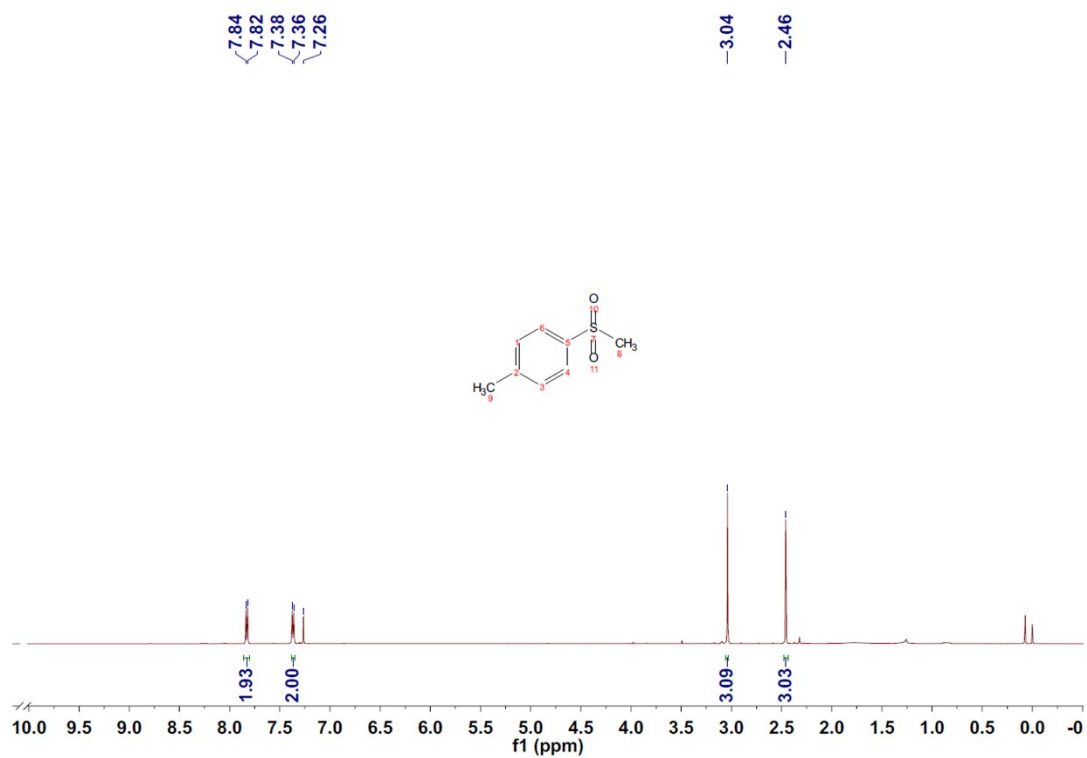

<sup>1</sup>H-NMR Spectra of methyl p-tolyl sulfone.

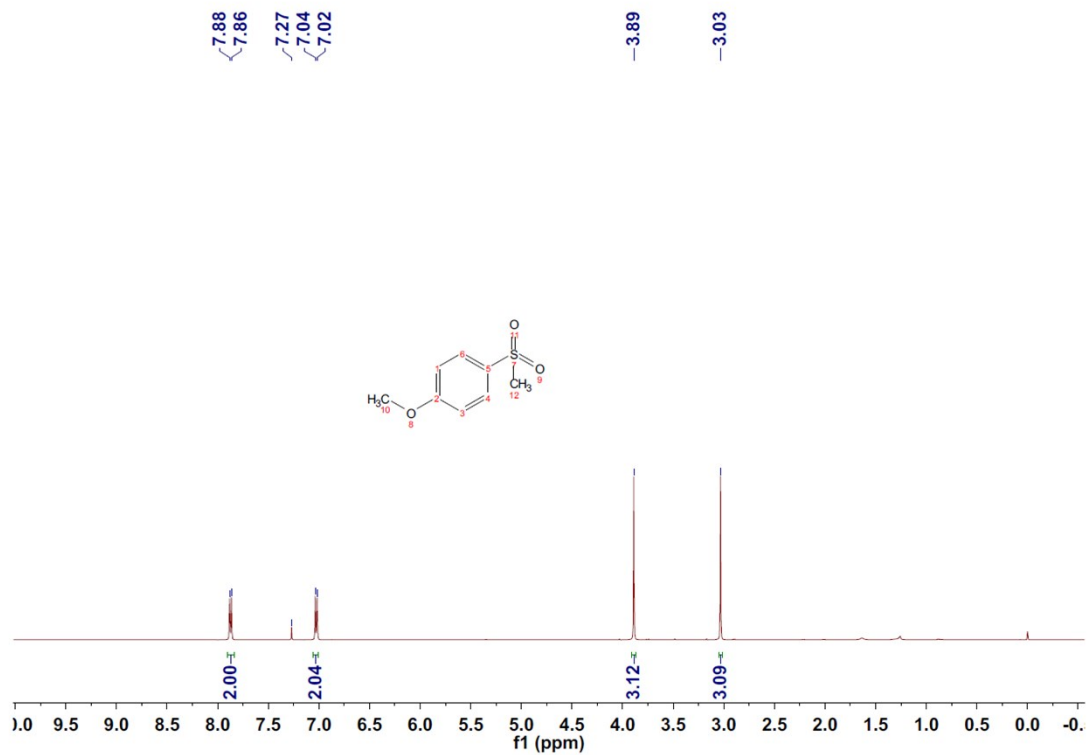

<sup>1</sup>H-NMR Spectra of 4-methoxyphenylmethyl sulfone.

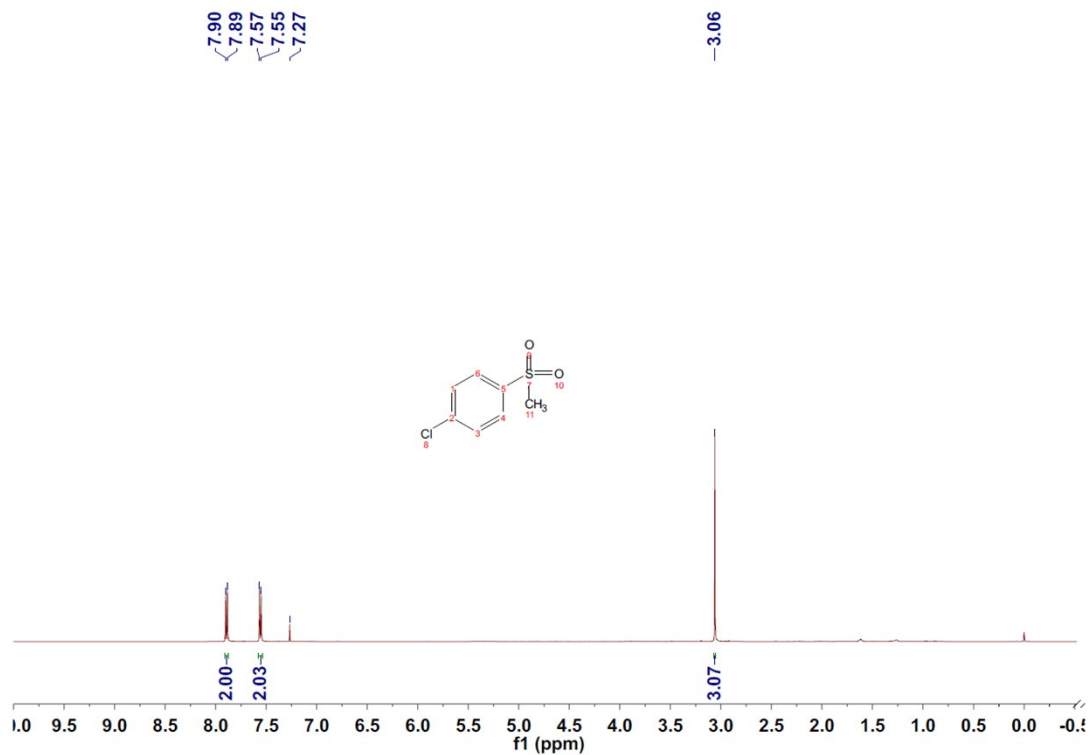

<sup>1</sup>H-NMR Spectra of 4-chlorophenyl methyl sulfone.

## 10. Recycling tests of the V-Ni-MOF

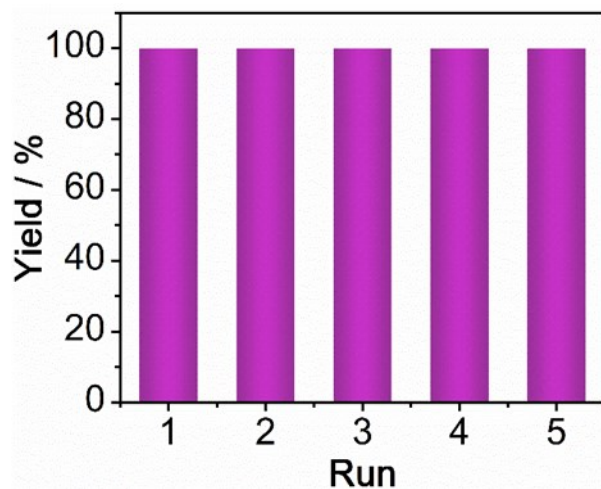

**Figure S7.** Recycling tests for sulfide oxidation using the V-Ni-MOF.

## 11. SEM images of V-Ni-MOF

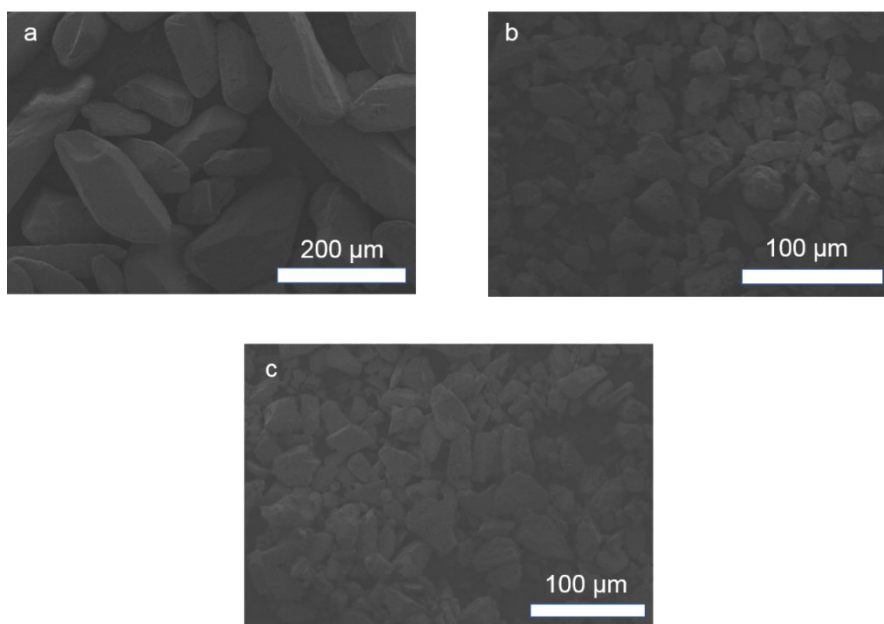

**Figure S8.** (a) The crystal SEM images of V-Ni-MOF; (b) SEM images of the grinded V-Ni-MOF; (c) SEM images of the grinded V-Ni-MOF after sulfide oxidation.

## 12. Compared with the crystalline materials containing polyoxovanadate

**Table S3.** Compared with the crystalline materials containing polyoxovanadate used in oxidation reactions of sulfides

| Entry | Catalyst                                                                 | Time (h) | Oxidant                       | T (°C) | Con. (%) | Reference |
|-------|--------------------------------------------------------------------------|----------|-------------------------------|--------|----------|-----------|
| 1     | $K_6H[V^{IV}_{17}V^{IV}_{12}(OH)_4O_{60}(OOC(CH_2)_4COO)_8] \cdot nH_2O$ | 1        | TBHP                          | 25     | 98       | 1         |
| 2     | $[(C_2N_2H_8)_4(CH_3O)_4V^{IV}_4V^{IV}_4O_{16}] \cdot 4CH_3OH$           | 4        | TBHP                          | 40     | 100%     | 2         |
| 3     | $[Co_2L_{0.5}V_4O_{12}] \cdot 3DMF \cdot 5H_2O$                          | 4        | TBHP                          | 50     | > 99%    | 3         |
| 4     | $[V_8^{IV}O_8(CH_3O)_{16}(C_2O_4)](C_6NH_{16})_2(CH_3OH)_2$              | 4        | TBHP                          | 40     | 100%     | 4         |
| 5     | $(NH_2Me_2)_{12}[V_5O_9Cl)_6(L)_8] \cdot [MeOH]_7$                       | 1        | TBHP                          | 25     | 100%     | 5         |
| 6     | $[Co_2L_{0.5}V_4O_{12}] \cdot 3DMF \cdot 5H_2O$                          | 4        | H <sub>2</sub> O <sub>2</sub> | 50     | trace    | 3         |
| 7     | V-Ni-MOF                                                                 | 0.75     | TBHP                          | 25     | 100%     | This work |
| 8     | V-Ni-MOF                                                                 | 0.25     | TBHP                          | 40     | 100%     | This work |
| 9     | V-Ni-MOF                                                                 | 1        | H <sub>2</sub> O <sub>2</sub> | 40     | 100%     | This work |

## 13. References

1. K. Wang, Y. Niu, D. Zhao, Y. Zhao, P. Ma, D. Zhang, J. Wang and J. Niu, The Polyoxovanadate-Based Carboxylate Derivative  $K_6H[V^{IV}_{17}V^{IV}_{12}(OH)_4O_{60}(OOC(CH_2)_4COO)_8] \cdot nH_2O$ : Synthesis, Crystal Structure, and Catalysis for Oxidation of Sulfides, *Inorg. Chem.*, 2017, **56**, 14053-14059.
2. J. P. Cao, Y. S. Xue, N. F. Li, J. J. Gong, R. K. Kang and Y. Xu, Lewis Acid Dominant Windmill-Shaped V<sub>8</sub> Clusters: A Bifunctional Heterogeneous Catalyst for CO<sub>2</sub> Cycloaddition and Oxidation of Sulfides, *J. Am. Chem. Soc.*, 2019, **141**, 19487-19497.
3. B. B. Lu, J. Yang, Y. Y. Liu and J. F. Ma, A Polyoxovanadate-Resorcin[4]arene-Based Porous Metal-Organic Framework as an Efficient Multifunctional Catalyst for the Cycloaddition of CO<sub>2</sub> with Epoxides and the Selective Oxidation of Sulfides, *Inorg. Chem.*, 2017, **56**, 11710-11720.
4. Q. D. Ping, J. P. Cao, Y. M. Han, M. X. Yang, Y. L. Hong, J. N. Li, J. L. Wang, J. L. Chen, H. Mei and Y. Xu, Eight-membered ring petal-shaped V<sub>8</sub> cluster: An efficient heterogeneous catalyst for selective sulfur oxidation, *Inorg. Chim. Acta*, 2021, **517**, 120198.
5. H. M. Gan, C. Qin, L. Zhao, C. Sun, X. L. Wang and Z. M. Su, Self-Assembled Polyoxometalate-Based Metal-Organic Polyhedra as an Effective

Heterogeneous Catalyst for Oxidation of Sulfide, *Cryst. Growth Des*, 2021, **21**, 1028-1034.
